# Supplementary material for: Clinical Implementation of β-Tubulin Gene-Based Aspergillus Polymerase Chain Reaction for Enhanced Aspergillus Diagnosis in Patients with Hematologic Diseases: A Prospective Observational Study
Source: MDPI journal article supplement (doi:10.3390/jof9121192), 2023-12-13

## Contents of Supporting information

|                                                                                                      |   |
|------------------------------------------------------------------------------------------------------|---|
| <b>Supplementary Methods</b> .....                                                                   | 1 |
| <b>Table S1.</b> Primer sequence used for the $\beta$ -tubulin gene PCR assay.....                   | 4 |
| <b>Table S2.</b> Results of <i><math>\beta</math>-tubulin</i> gene-based <i>Aspergillus</i> PCR..... | 5 |
| <b>Figure S1.</b> PCR inhibitor effects on test results via SPUD assay.....                          | 7 |

## Supplementary Methods

### *2.4 Fungal DNA extraction from bronchoalveolar lavage fluid*

Clinical samples were isolated from the room temperature environment, aliquoted and stored at -80 °C until use in experiments. Before the experiment, the clinical sample was rapidly melted at 37 °C and used in the experiment. 1–3 mL of the BAL fluid sample was centrifuged at  $10,000 \times g$  for 5 min at room temperature, and the pellet and supernatant were separated and transferred to a new 1.5 mL tube. The BAL fluid sample used in the experiment is strictly  $\geq 1\text{ mL}$ , which is a condition considering the minimum detection limit included in the extracted DNA. The separated supernatant was stored at 4 °C to prevent degradation of suspended free DNA that may be included in the sample. Supernatant was included in the extraction process to extract DNA eluted from AFT or DNA containing an immune response exposed in a clinical state. This is a way to determine if the patient has been exposed to the fungus. After washing the pellet with 1 mL of PBS, 50  $\mu\text{L}$  of PBS, and 5  $\mu\text{L}$  of protease K were added, followed by a reaction at 65 °C for 30 min. Equal volumes of glass beads (1.0-mm zirconium beads; Sigma-Aldrich, St. Louis, MO, USA) were applied, followed by bead beating at maximum speed for five rounds of 1 min each. To prevent DNA denaturation, the tube was sufficiently cooled in a cold environment in the middle of bead beating. A total of 500  $\mu\text{L}$  of the supernatant was added to the storage, pipetted more than 10 times, and transferred to a new tube. Subsequently, DNA extraction was performed using the High Pure PCR Template Preparation Kit (Roche, Basel, Switzerland), according to the manufacturer's protocol, and DNA was eluted in less than 100  $\mu\text{L}$  for later use. DNA must be eluted in  $< 100$

μL and is the minimum value to increase the number of DNA copies included per μL with the volume for the minimum detection limit. DNA extraction using bead beating is an excellent DNA extraction method for fungi and is a recommended approach in terms of time, stability, and efficiency. Additionally, DNA can be extracted quickly and simply using other commercially available kits. As a method of eluting high-quality DNA, you can perform lysis using a DNA extraction buffer after bead beating and then use a phenol:chloroform:isoamyl alcohol solution. Although it satisfies high yield and quality, the complexity and harmfulness of the purification process cannot be ruled out due to the use of reagents such as phenol.

Afterwards, the following experiment was performed to confirm that DNA extraction was performed properly using the culture-negative BAL solution. After adding 10-fold diluted *A. fumigatus* conidia  $1 \times 10^5$  to 1 mL of BAL solution and extracting *Aspergillus* DNA by the above method, probe real-time PCR was performed as follows. After sequentially diluting the *Aspergillus* positive control (APC) samples and performing PCR in the same manner, a standard curve was drawn to confirm that DNA was properly extracted from the conidia.

**Table S1. Primer sequence used for the  $\beta$ -tubulin gene PCR assay**

| PCR                        | Target species          | Primers / probes | Sequence (5' → 3')                     | Target loci   | Product size  |
|----------------------------|-------------------------|------------------|----------------------------------------|---------------|---------------|
| Multiplex<br>real-time PCR | <i>Aspergillus spp.</i> | benA F3          | TCGGTGTAGTGACCCTTGG                    | <i>benA</i>   | 254 ~ 272 bp  |
|                            |                         | benA R2          | GCTGGAGCGYATGAACGTCT                   |               |               |
| primer                     | <i>A. fumigatus</i>     | TR F1            | TAATCGCAGCACCACCTTCAG                  | <i>cyp51A</i> | WT: 111 bp    |
|                            |                         | TR R1            | AGGGTGTATGGTATGCTGGAA                  |               | TR34 : 145 bp |
| Hydrolysis<br>probe        | Ascomycetes             | Asco 1F9         | 6-FAM-AVACGAAGTTGTCGGGRC- BHQ1         | <i>benA</i>   | 18 bp         |
|                            | Section <i>Fumigati</i> | Fumi 1R2         | CY5-CGGCAACATCTCACGATCTGACTCGC-BHQ3    |               | 26 bp         |
|                            | Section <i>Nigri</i>    | Nig 1R26         | HEX-ACTTCAGCAGGCTAGCGGTAACAAGT- BHQ1   |               | 26 bp         |
|                            | Section <i>Flavi</i>    | Flavi 1F18       | HEX-CGGTCAGGAGTTGCAAAGCGTTTTCA-BHQ1    |               | 26 bp         |
|                            | Section <i>Terrei</i>   | Terrei 1R29      | 6-FAM-ACCATCCTGGGACAGATTCTYCACGC- BHQ1 |               | 26 bp         |
|                            | <i>A. tubingensis</i>   | Tub_1R21         | CY5- AGGTTAGATCACACCGTCCCTGAGTT- BHQ3  |               | 25 bp         |

*BenA*,  $\beta$ -tubulin; bp, base pair; *cyp51A*, Cytochrome P450 Sterol 14-alpha demethylase; TR, tandem repeat; WT, wild type.

**Table S2. Results of  $\beta$ -tubulin gene-based *Aspergillus* PCR**

| No. | Specimen No. | <i>Ascomycete</i> | <i>Fumigati</i> | <i>Nigri</i> | <i>Terrei</i> | <i>Flavi</i> | <i>A. tubingensis</i> |
|-----|--------------|-------------------|-----------------|--------------|---------------|--------------|-----------------------|
| 1   | BF075        |                   |                 |              |               |              |                       |
| 2   | BF076        | +                 | +               |              |               |              |                       |
| 3   | BF103        |                   |                 |              |               |              |                       |
| 4   | BF110        | +                 | +               |              |               |              |                       |
| 5   | BF126        |                   |                 |              |               |              |                       |
| 6   | BF134        |                   |                 |              |               |              |                       |
| 7   | BF135        |                   |                 |              |               |              |                       |
| 8   | BF136        | +                 |                 | +            |               |              |                       |
| 9   | BF137        | +                 |                 |              |               | +            |                       |
| 10  | BF191        |                   |                 |              |               |              |                       |
| 11  | BF192        |                   |                 |              |               |              |                       |
| 12  | BF209        |                   |                 |              |               |              |                       |
| 13  | BF217        |                   |                 |              |               |              |                       |
| 14  | BF218        |                   |                 |              |               |              |                       |
| 15  | BF225        |                   |                 |              |               |              |                       |
| 16  | BF232        |                   |                 |              |               |              |                       |
| 17  | BF233        |                   |                 |              |               |              |                       |
| 18  | BF234        | +                 |                 |              |               |              |                       |
| 19  | BF235        |                   |                 |              |               |              |                       |
| 20  | BF240        | +                 |                 |              | +             |              |                       |
| 21  | BF241        | +                 |                 |              |               | +            |                       |
| 22  | BF245        | +                 |                 |              |               |              |                       |
| 23  | BF246        | +                 |                 |              |               |              |                       |
| 24  | BF247        |                   |                 |              |               |              |                       |
| 25  | BF248        |                   |                 |              |               |              |                       |
| 26  | BF251        | +                 | +               |              |               |              |                       |
| 27  | BF252        |                   |                 |              |               |              |                       |
| 28  | BF256        | +                 |                 |              |               |              |                       |
| 29  | BF257        |                   |                 |              |               |              |                       |
| 30  | BF258        | +                 |                 |              |               |              |                       |
| 31  | BF260        | +                 |                 |              |               | +            |                       |
| 32  | BF261        | +                 | +               | +            |               |              | +                     |
| 33  | BF262        |                   |                 |              |               |              |                       |
| 34  | BF270        | +                 |                 | +            |               |              |                       |
| 35  | BF275        |                   |                 |              |               |              |                       |
| 36  | BF276        | +                 |                 | +            |               |              |                       |
| 37  | BF277        |                   |                 |              |               |              |                       |
| 38  | BF278        |                   |                 |              |               |              |                       |
| 39  | BF279        |                   |                 |              |               |              |                       |
| 40  | BF280        | +                 | +               |              |               |              |                       |
| 41  | BF286        | +                 | +               |              |               |              |                       |
| 42  | BF302        | +                 |                 |              |               | +            |                       |
| 43  | BF303        |                   |                 |              |               |              |                       |
| 44  | BF304        |                   |                 |              |               |              |                       |
| 45  | BF305        | +                 | +               |              |               |              |                       |
| 46  | BF313        |                   |                 |              |               |              |                       |
| 47  | BF314        | +                 |                 |              |               | +            |                       |
| 48  | BF315        |                   |                 |              |               |              |                       |
| 49  | BF323        | +                 | +               |              |               |              |                       |
| 50  | BF333        | +                 |                 | +            |               |              |                       |
| 51  | BF334        | +                 |                 | +            |               |              |                       |
| 52  | BF335        | +                 | +               |              |               |              |                       |

|                         |       |                   |                 |              |               |              |                       |
|-------------------------|-------|-------------------|-----------------|--------------|---------------|--------------|-----------------------|
| 53                      | BF348 | +                 |                 | +            |               |              |                       |
| 54                      | BF349 | +                 |                 | +            |               |              | +                     |
| 55                      | BF350 | +                 |                 | +            |               |              |                       |
| 56                      | BF360 | +                 | +               | +            |               |              |                       |
| 57                      | BF361 | +                 |                 | +            |               |              |                       |
| 58                      | BF362 | +                 | +               |              |               |              |                       |
| 59                      | BF375 | +                 |                 |              |               |              |                       |
| 60                      | BF376 | +                 |                 | +            |               |              |                       |
| 61                      | BF379 |                   |                 |              |               |              |                       |
| 62                      | BF383 | +                 |                 | +            |               |              |                       |
| 63                      | BF384 | +                 | +               | +            |               |              |                       |
| 64                      | BF392 |                   |                 |              |               |              |                       |
| 65                      | BF396 | +                 |                 | +            |               |              |                       |
| 66                      | BF397 | +                 | +               |              |               |              |                       |
| 67                      | BF399 |                   |                 |              |               |              |                       |
| 68                      | BF402 | +                 |                 |              |               |              |                       |
| 69                      | BF404 |                   |                 |              |               |              |                       |
| 70                      | BF405 |                   |                 |              |               |              |                       |
| 71                      | BF412 |                   |                 |              |               |              |                       |
| 72                      | BF417 |                   |                 |              |               |              |                       |
| 73                      | BF423 |                   |                 |              |               |              |                       |
| 74                      | BF424 |                   |                 |              |               |              |                       |
| 75                      | BF425 |                   |                 |              |               |              |                       |
| 76                      | BF437 |                   |                 |              |               |              |                       |
|                         |       | <i>Ascomycete</i> | <i>Fumigati</i> | <i>Nigri</i> | <i>Terrei</i> | <i>Flavi</i> | <i>A. tubingensis</i> |
| Result<br>(Coinfection) |       | 38                | 13 (3)          | 15 (3)       | 1             | 5            | 2                     |

**Figure S1. PCR inhibitor effects on test results via SPUD assay.**

SPUD assay was performed to confirm the PCR inhibitor using 40 bronchoalveolar lavage (BAL) fluid and 20 DW samples. The results confirmed that the  $C_p$  value between the two PCRs differed within 1, which indicate that there was no PCR inhibitor in the BAL fluid sample or had no significant affect.  $C_p$ , crossing point.

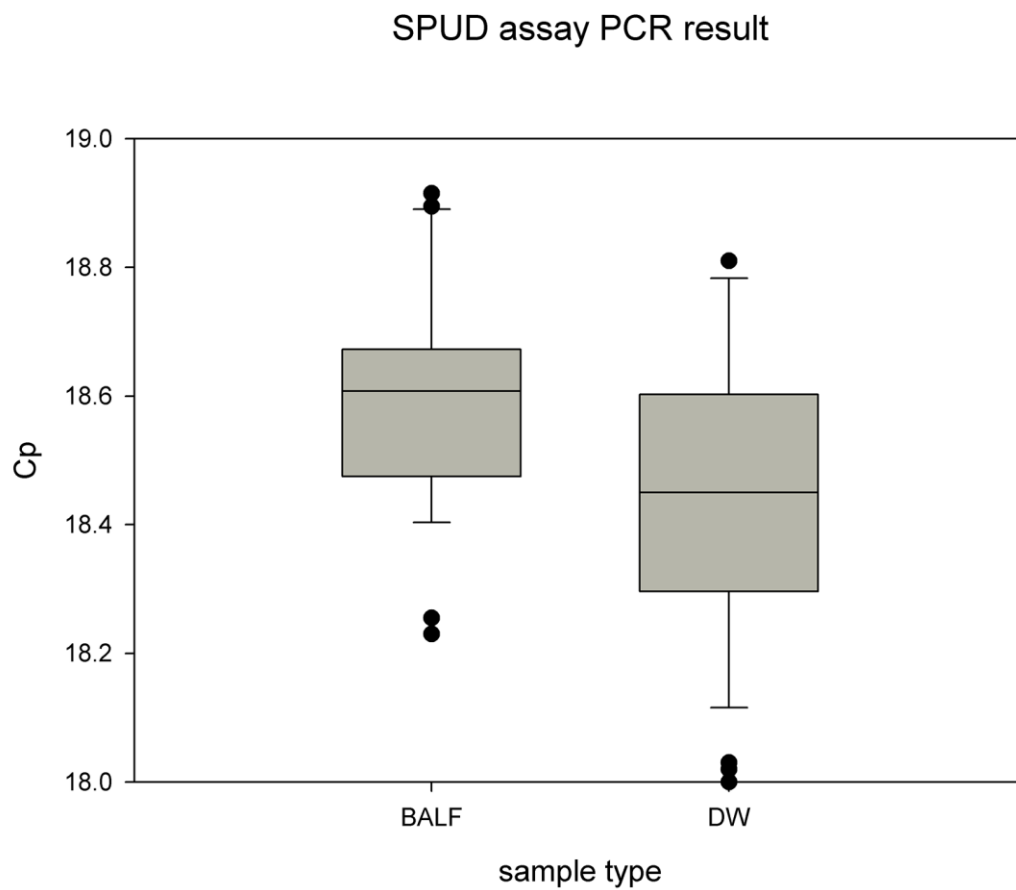

Supplement: s1 [file s1]
